# Supplementary material
Source: Elsevier journal article supplement (https://www.sciencedirect.com/science/article/pii/S0211139X21001438)
Supplement: mmc1 [file S0211139X21001438:mmc1.pdf]

Respuesta al revisor en relación con el caso clínico "Hiponatremia e infección por SARS-CoV-2: a propósito de un caso. Hyponatremia and SARS-CoV-2 infection: a case report." (Ref. REGG-D-21-00131).

Lo primero, agradecer al revisor sus comentarios y sugerencias para mejorar nuestro caso clínico. A continuación, ofrecemos una respuesta detallada incluyendo los cambios realizados en el manuscrito.

Revisor nº1: El manuscrito titulado hiponatremia en infección por SARS-CoV-2, aborda un caso clínico interesante y novedoso. Sin embargo, presenta algunos aspectos que se deben mejorar o considerar:

\* Añadir la situación social

> *Perdón por no haberlo incluido. Se trata de una mujer que vive en su domicilio con un hijo.*

\* Recomiendo añadir entre paréntesis los valores normales de laboratorio de la osmolaridad, del Na<sup>+</sup> en orina de la TSH y del cortisol basal.

> *Muchas gracias por la recomendación. Los valores normales según las unidades empleadas en nuestro laboratorio son: osmolaridad en orina 50-1200 mOsm/Kg, sodio en orina 40-250 mmol/L, TSH 0,35-4,95 uUi/mL y cortisol basal 3,7-19,4 ug/dL. Los incorporamos al texto.*

\* En el primer párrafo de la página 2:

- Se debe indicar en cuánto tiempo se ha pasado de 121mmol/L a 135mmol/L de Sodio plasmático

> *Gracias por la indicación. Efectivamente, el tiempo hasta la corrección es importante y fue de 5 días. Lo incluimos en el manuscrito.*

- Se menciona que se realiza restricción hídrica, se administra suero salino hipertónico y furosemida. Recomiendo explicar el motivo por el que se procedió así. Puede resultar de interés explicar el concepto de la ecuación de Furst: (Na urinario+Kurinario)/Naplasmático. Furst H, et al. Am J Med Sci 2000; 319 (4): 240-244

> *Gracias por la propuesta. De acuerdo con el algoritmo de tratamiento de la hiponatremia publicado en 2012 por Runkle, et al. inicialmente se administró suero salino hipertónico y ante la persistencia de cifras bajas de Na se procedió a la restricción hídrica, así mismo, a la espera de descartar otras causas y para evitar la sobrecarga hídrica, se administró tratamiento diurético. Finalmente, ante la sospecha de SIADH y la escasa mejoría, se pautó tolvaptán.*

*Gracias por el artículo. Desconocía la fórmula y me ha gustado ver su utilidad para individualizar la restricción hídrica necesaria en cada caso.*

\* En el penúltimo párrafo del manuscrito el autor explica el manejo de la hiponatremia y no menciona el uso del tolvaptan...Recomiendo corregir esta parte y explicar mejor cómo se maneja la hiponatremia en los mayores. Se debe comentar la utilidad de la Urea y los efectos adversos del Tolvaptan. Recomendando para la corrección de este apartado, la lectura de la siguiente bibliografía: Runkle I, Villabona C, Navarro A, Pose A, Formiga F, Alberto Tejedor, Poch E. Algoritmo de Tratamiento de la HIPONATREMIA. Mayo de 2012.

*> Disculpa por la falta de información. Siendo más precisos, añadimos que en los casos de síntomas moderados o leves y/o hiponatremia de > 48 horas con sodio  $\geq 120$  mmol/L se recomienda la restricción hídrica según la ecuación de Furst que calcula el aclaramiento de agua libre:  $(Na_o + K_o)/Na_p$ . Si el resultado es  $> 1$  o no es posible la restricción, se recomienda el uso de tolvaptán 15mg/día con reevaluaciones periódicas y aumento de dosis si fuera necesario. Entre las reacciones adversas más frecuentes del tolvaptán están la poliuria, la nicturia y la polaquiuria. Mencionar, que la urea como estimulante de la excreción renal de agua libre, ha resultado segura y eficaz en el tratamiento de la hiponatremia. Muchas gracias por la referencia.*

Añadimos los cambios en la nueva versión del manuscrito (Ref. REGG-D-21-00131).
